# Supplementary material
Source: publisher figshare collection journal article supplement (https://acs.figshare.com/ndownloader/files/22679138)
Supplement: Supplementary file 1 [file 22679138]

**Theoretical analysis of sessile evaporating droplet on curved  
substrate with interfacial cooling effect**

Yang Shen<sup>1</sup>, Yongpan Cheng<sup>1,\*</sup>, Jinliang Xu<sup>1,\*</sup>, Kai Zhang<sup>2</sup>, Yi Sui<sup>3</sup>.

1. Beijing Key Laboratory of Multiphase Flow and Heat Transfer for Low Grade Energy,  
North China Electric Power University, Beijing 102206, China
2. Beijing Key Laboratory of Emission Surveillance and Control for Thermal Power  
Generation, North China Electric Power University, Beijing 102206, China
3. School of Engineering and Materials Science, Queen Mary University of London,  
Mile End Road, London, E1 4NS, United Kingdom.

**1. The toriodal coordinate system**

For droplet with low Bond number, the gravitational effect can be ignored, hence the droplet have the shape of spherical cap, here the curved substrate is also assumed to have the shape of spherical cap, hence their boundaries can be exactly mapped in toroidal coordinates( $\alpha, \beta$ ), as shown in Figure S1.  $\theta_{CA}$  is the contact angle of droplet with substrate surface,  $\theta_{Sub}$  is the tangential angle of curved substrate over the horizontal bottom,  $\theta = \theta_{CA} + \theta_{Sub}$  is the cutting angle of droplet edge over the horizontal substrate bottom. The bottom of the substrate is at the temperature  $T_w$ , heat is transferred to the droplet surface for evaporation through substrate and droplet. The ambient temperature and vapor concentration are  $T_\infty$  and  $C_\infty$  respectively.

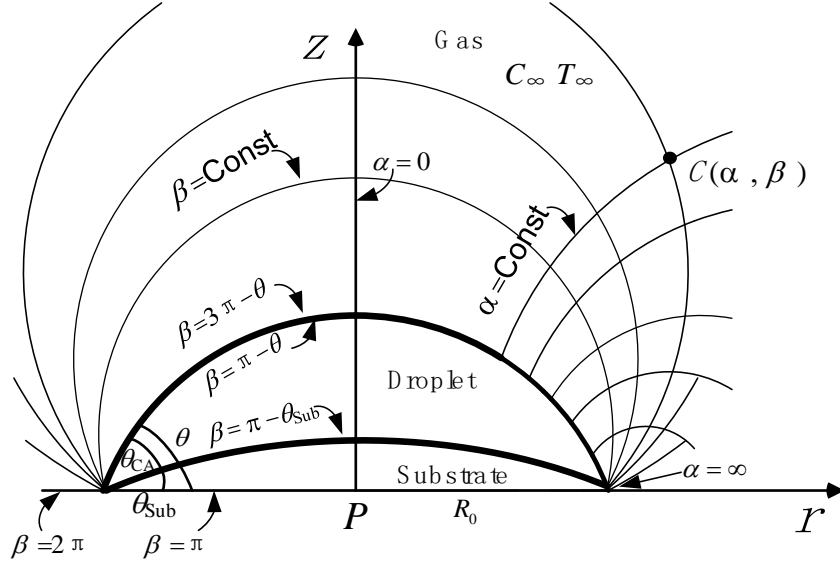

Figure S1. Schematic diagram of a sessile evaporating droplet on curved substrate in toroidal coordinate

The relationship between the toroidal coordinate  $(\alpha, \beta)$  and the cylindrical coordinate  $(r, z)$  is shown below

$$r / \sinh \alpha = z / \sin \beta = R(\cosh \alpha - \cos \beta)^{-1} \quad (1)$$

where  $R$  is base radius of droplet.

The convective heat transfer inside the droplet and the vapor is ignored, hence both heat transfer and vapor transfer are diffusion-controlled, the temperature and vapor concentration are governed by the Laplace equation  $\nabla^2 T = 0$  and  $\nabla^2 C = 0$ .

## 2. The boundary conditions

The boundary conditions of vapor concentration and temperature are as follows:

For vapor region around the droplet ( $0 \leq \alpha < \infty, 2\pi \leq \beta \leq 3\pi - \theta$ )

(1) In the region far from the droplet, temperature and vapor concentration are  $T_\infty, C_\infty$  respectively

(2) At the axis of symmetry:

$$(\partial C(\alpha, \beta) / \partial \alpha)_{\alpha=0} = 0$$

(3) At the gas-solid interface, no penetration for vapor into the solid substrate:

$$(\partial C(\alpha, \beta) / \partial \beta)_{\beta=2\pi} = 0$$

(4) At the gas-liquid interface, the heat transfer is coupled with the evaporative mass transfer, i.e. evaporative cooling effect is considered.

$$(q(\alpha))_{\beta=\pi-\theta} = L(J(\alpha))_{\beta=3\pi-\theta}$$

where  $q(\alpha)$  is heat flux,  $L$  is liquid latent heat of vaporization,  $J(\alpha)$  is evaporative flux.

For temperature region within the droplet ( $0 \leq \alpha < \infty, \pi - \theta \leq \beta \leq \pi - \theta_{\text{Sub}}$ )

(1) At the axis of symmetry:

$$(\partial T_L(\alpha, \beta) / \partial \alpha)_{\alpha=0} = 0$$

(2) At the solid-liquid interface, the heat transfer inside the substrate and droplet is coupled together, hence there is no temperature jump across the interface.

$$T_L(\alpha, \pi - \theta_{\text{Sub}}) = T_S(\alpha, \pi - \theta_{\text{Sub}})$$

The heat flux is identical from both sides

$$\frac{(\cosh \alpha - \cos \beta)}{R} \frac{\partial T_L(\alpha, \beta)}{\partial \beta} \Big|_{\beta=\pi-\theta_{\text{Sub}}} = k_R \frac{(\cosh \alpha - \cos \beta)}{R} \frac{\partial T_S(\alpha, \beta)}{\partial \beta} \Big|_{\beta=\pi-\theta_{\text{Sub}}}$$

where  $k_R = k_s / k_L$  is relative thermal conductivity of substrate and droplet.

For temperature region within the substrate ( $0 \leq \alpha < \infty, \pi - \theta_{\text{Sub}} \leq \beta \leq \pi$ )

(1) At the axis of symmetry:

$$(\partial T_S(\alpha, \beta) / \partial \alpha)_{\alpha=0} = 0$$

(2) On the bottom, the temperature is constant

$$T_S(\alpha, \pi) = T_w$$

### 3. The vapor concentration field and temperature field

The above boundary conditions are applied to solve the governing equation

$\nabla^2 T = 0$  and  $\nabla^2 C = 0$ . According to Nguyen et al.[24], the vapor concentration and temperature field can be obtained in the toroidal coordinate:

Vapor concentration outside the droplet:

$$C(\alpha, \beta) = C_\infty + \sqrt{\cosh \alpha - \cos \beta} \int_0^\infty E_C^*(\tau) P_{i\tau-0.5}(\cosh \alpha) \cosh[(2\pi - \beta)\tau] d\tau \quad (2)$$

Temperature field inside the droplet:

$$T_L(\alpha, \beta) = T_w + \sqrt{\cosh \alpha - \cos \beta} \int_0^\infty P_{i\tau-0.5}(\cosh \alpha) [M(\tau) \cosh(\tau\beta) + N(\tau) \sinh(\tau\beta)] d\tau \quad (3)$$

Temperature field inside the substrate

$$T_S(\alpha, \beta) = T_w + \sqrt{\cosh \alpha - \cos \beta} \int_0^\infty E_S^*(\tau) P_{i\tau-0.5}(\cosh \alpha) \sinh[(\pi - \beta)\tau] d\tau \quad (4)$$

where  $\tau$ ,  $P_{i\tau-0.5}(\cosh \alpha)$  are the integration dummy, Legendre functions of the first kind, respectively,  $T_w$  is the temperature of the substrate bottom,  $E_C^*(\tau)$  and  $E_S^*(\tau)$  are functions of the integration dummy, and independent of the toroidal coordinates  $\alpha$  and  $\beta$ .

At the solid-liquid interface, according to  $T_L(\alpha, \pi - \theta_{\text{Sub}}) = T_S(\alpha, \pi - \theta_{\text{Sub}})$ , the following can be obtained as

$$M(\tau) \cosh[\tau(\pi - \theta_{\text{Sub}})] + N(\tau) \sinh[\tau(\pi - \theta_{\text{Sub}})] = E_S^*(\tau) \sinh(\theta_{\text{Sub}}\tau) \quad (5)$$

The temperature gradient at the liquid side:

$$\begin{aligned} \left. \frac{\partial T_L(\alpha, \beta)}{\partial \beta} \right|_{\beta=\pi-\theta_{\text{Sub}}} = & \\ & \frac{\sin \theta_{\text{Sub}}}{2\sqrt{\cosh \alpha + \cos \theta_{\text{Sub}}}} \int_0^\infty P_{i\tau-0.5}(\cosh \alpha) \{M(\tau) \cosh[\tau(\pi - \theta_{\text{Sub}})] + N(\tau) \sinh[\tau(\pi - \theta_{\text{Sub}})]\} d\tau + \\ & \sqrt{\cosh \alpha + \cos \theta_{\text{Sub}}} \int_0^\infty \tau P_{i\tau-0.5}(\cosh \alpha) \{M(\tau) \sinh[\tau(\pi - \theta_{\text{Sub}})] + N(\tau) \cosh[\tau(\pi - \theta_{\text{Sub}})]\} d\tau \end{aligned} \quad (6)$$

The temperature gradient at the solid side:

$$\begin{aligned} \frac{\partial T_s(\alpha, \beta)}{\partial \beta} \Big|_{\beta=\pi-\theta_{\text{Sub}}} &= \frac{\sin \theta_{\text{Sub}}}{2\sqrt{\cosh \alpha + \cos \theta_{\text{Sub}}}} \int_0^\infty P_{i\tau-0.5}(\cosh \alpha) E_s^*(\tau) \sinh(\theta_{\text{Sub}} \tau) d\tau + \\ &\sqrt{\cosh \alpha + \cos \theta_{\text{Sub}}} \int_0^\infty (-\tau) P_{i\tau-0.5}(\cosh \alpha) E_s^*(\tau) \cosh(\theta_{\text{Sub}} \tau) d\tau \end{aligned} \quad (7)$$

According to

$$\frac{(\cosh \alpha - \cos \beta)}{R} \frac{\partial T_L(\alpha, \beta)}{\partial \beta} \Big|_{\beta=\pi-\theta_{\text{Sub}}} = k_R \frac{(\cosh \alpha - \cos \beta)}{R} \frac{\partial T_s(\alpha, \beta)}{\partial \beta} \Big|_{\beta=\pi-\theta_{\text{Sub}}}$$

The following can be obtained

$$\begin{aligned} &\int_0^\infty \tau P_{i\tau-0.5}(\cosh \alpha) \{M(\tau) \sinh[\tau(\pi - \theta_{\text{Sub}})] + N(\tau) \cosh[\tau(\pi - \theta_{\text{Sub}})] + K_R E_s^*(\tau) \cosh(\theta_{\text{Sub}} \tau)\} d\tau \\ &= (K_R - 1) \frac{\sin \theta_{\text{Sub}}}{2(\cosh \alpha + \cos \theta_{\text{Sub}})} \int_0^\infty P_{i\tau-0.5}(\cosh \alpha) E_s^*(\tau) \sinh(\theta_{\text{Sub}} \tau) d\tau \end{aligned} \quad (8)$$

Here the followings are defined as

$$F(\theta, \tau) = \int_0^\infty \frac{\sinh \alpha}{(\cosh \alpha + \cos \theta)^{3/2}} P_{i\tau-0.5}(\cosh \alpha) d\alpha = \sin(\theta \tau) / [\sinh(\pi \tau) \sin \theta] \quad (9)$$

$$\frac{\partial F(\theta, \tau)}{\partial \theta} = \frac{3 \sin \theta}{2} \int_0^\infty \frac{\sinh \alpha}{(\cosh \alpha + \cos \theta)^{5/2}} P_{i\tau-0.5}(\cosh \alpha) d\alpha \quad (10)$$

Then Eq. (8) becomes

$$M(\tau) \sinh[\tau(\pi - \theta_{\text{Sub}})] + N(\tau) \cosh[\tau(\pi - \theta_{\text{Sub}})] = E_s^*(\tau) H(\theta_{\text{Sub}}, \tau) \quad (11)$$

where

$$H(\theta_{\text{Sub}}, \tau) = \frac{\frac{dF(\theta_{\text{Sub}}, \tau)}{d\theta} (k_R - 1) \sinh(\theta_{\text{Sub}} \tau)}{3\tau F(\theta_{\text{Sub}}, \tau)} - k_R \cosh(\theta_{\text{Sub}} \tau) \quad (12)$$

Together with Eqs. (5) and (11), the followings can be obtained as

$$N(\tau) = E_s^*(\tau) \{H(\theta_{\text{Sub}}, \tau) \cosh[(\pi - \theta_{\text{Sub}}) \tau] - \sinh(\theta_{\text{Sub}} \tau) \sinh[(\pi - \theta_{\text{Sub}}) \tau]\} \quad (13)$$

$$M(\tau) = E_s^*(\tau) \{-H(\theta_{\text{Sub}}, \tau) \sinh[(\pi - \theta_{\text{Sub}}) \tau] + \sinh(\theta_{\text{Sub}} \tau) \cosh[(\pi - \theta_{\text{Sub}}) \tau]\} \quad (14)$$

Then Eq. (3) becomes

$$T_L(\alpha, \beta) = T_w + \sqrt{\cosh \alpha - \cos \beta} \quad (15)$$

$$\int_0^\infty P_{i\tau-0.5}(\cosh \alpha) E_S^*(\tau) \{ -H(\theta_{\text{Sub}}, \tau) \sinh[(\pi - \theta_{\text{Sub}} - \beta)\tau] + \sinh(\theta_{\text{Sub}} \tau) \cosh[(\pi - \theta_{\text{Sub}} - \beta)\tau] \} d\tau$$

At the gas-liquid interface:

$$(q(\alpha))_{\beta=\pi-\theta} = \frac{k_L}{R} (\cosh \alpha + \cos \theta) \frac{\partial T_L(\alpha, \beta)}{\partial \beta} \Big|_{\beta=\pi-\theta}$$

$$= \frac{k_L}{R} (\cosh \alpha + \cos \theta)^{2/3} \int_0^\infty E_S^*(\tau) P_{i\tau-0.5}(\cosh \alpha) \left\{ \frac{\sin \theta}{2(\cosh \alpha + \cos \theta)} \{ -H(\theta_{\text{Sub}}, \tau) \sinh[(\theta - \theta_{\text{Sub}})\tau] \right. \quad (16)$$

$$\left. + \sinh(\theta_{\text{Sub}} \tau) \cosh[(\theta - \theta_{\text{Sub}})\tau] \} - \tau \{ -H(\theta_{\text{Sub}}, \tau) \cosh[(\theta - \theta_{\text{Sub}})\tau] + \sinh(\theta_{\text{Sub}} \tau) \sinh[(\theta - \theta_{\text{Sub}})\tau] \} \right\} d\tau$$

Defining

$$f(k_R, \tau) = -H(\theta_{\text{Sub}}, \tau) \sinh[(\theta - \theta_{\text{Sub}})\tau] + \sinh(\theta_{\text{Sub}} \tau) \cosh[(\theta - \theta_{\text{Sub}})\tau] \quad (17)$$

$$g(k_R, \tau) = -H(\theta_{\text{Sub}}, \tau) \cosh[(\theta - \theta_{\text{Sub}})\tau] + \sinh(\theta_{\text{Sub}} \tau) \sinh[(\theta - \theta_{\text{Sub}})\tau] \quad (18)$$

Then heat flux across the gas-liquid interface in Eq. (16)

$$(q(\alpha))_{\beta=\pi-\theta} = \frac{k_L}{R} (\cosh \alpha + \cos \theta)^{2/3} \times \quad (19)$$

$$\int_0^\infty E_S^*(\tau) P_{i\tau-0.5}(\cosh \alpha) \left\{ \frac{\sin \theta}{2(\cosh \alpha + \cos \theta)} f(k_R, \tau) - \tau g(k_R, \tau) \right\} d\tau$$

The mass flux across the gas-liquid interface

$$(J(\alpha))_{\beta=3\pi-\theta} = \frac{D}{R} (\cosh \alpha + \cos \theta) \frac{\partial C(\alpha, \beta)}{\partial \beta} \Big|_{\beta=3\pi-\theta}$$

$$= \frac{(\cosh \alpha + \cos \theta)^{3/2}}{R / D} \times \quad (20)$$

$$\int_0^\infty E_C^*(\tau) P_{i\tau-0.5}(\cosh \alpha) \left\{ \frac{\cosh[(\theta - \pi)\tau] \sin \theta}{2(\cosh \alpha + \cos \theta)} - \tau \sinh[(\theta - \pi)\tau] \right\} d\tau$$

According to  $(q(\alpha))_{\beta=\pi-\theta} = L(J(\alpha))_{\beta=3\pi-\theta}$ , the following can be obtained:

$$\sin \theta \int_0^\infty \frac{P_{i\tau-0.5}(\cosh \alpha)}{\cosh \alpha + \cos \theta} \frac{k_L E_S^*(\tau) f(k_R, \tau) - L D E_C^*(\tau) \cosh[(\theta - \pi)\tau]}{2} d\tau \quad (21)$$

$$= \int_0^\infty P_{i\tau-0.5}(\cosh \alpha) \{ k_L E_S^*(\tau) \tau g(k_R, \tau) - L D E_C^*(\tau) \tau \sinh[(\theta - \pi)\tau] \} d\tau$$

Together with Eqs. (9), (10), it can be obtained as

$$\begin{aligned}
E_S^*(\tau) & \left\{ \frac{k_L f(k_R, \tau)}{3} \frac{\partial F(\theta, \tau)}{\partial \theta} - F(\theta, \tau) k_L \tau g(k_R, \tau) \right\} \\
& = E_C^*(\tau) \left\{ \frac{\partial F(\theta, \tau)}{\partial \theta} \frac{LD \cosh[(\theta - \pi)\tau]}{3} - LD \tau F(\tau, \theta) \sinh[(\theta - \pi)\tau] \right\}
\end{aligned} \tag{22}$$

It is assumed that the saturated vapor concentration varies linearly with temperature along the droplet surface,

$$C(\alpha, 3\pi - \theta) = a + bT_L(\alpha, \pi - \theta),$$

Together with Eqs. (2), (15), it can be obtained as

$$\begin{aligned}
C_\infty + \sqrt{\cosh \alpha + \cos \theta} \int_0^\infty E_C^*(\tau) P_{ir-0.5}(\cosh \alpha) \cosh[(\theta - \pi)\tau] d\tau \\
= a + bT_W + b\sqrt{\cosh \alpha + \cos \theta} \int_0^\infty P_{ir-0.5}(\cosh \alpha) E_S^*(\tau) f(k_R, \tau) d\tau
\end{aligned} \tag{23}$$

Hence

$$\int_0^\infty P_{ir-0.5}(\cosh \alpha) \{E_C^*(\tau) \cosh[(\theta - \pi)\tau] - bE_S^*(\tau) f(k_R, \tau)\} d\tau = \frac{a + bT_W - C_\infty}{\sqrt{\cosh \alpha + \cos \theta}} \tag{24}$$

According to the Mehler-Fock integral transform

$$\int_0^\infty \frac{\cosh \tau \theta}{\cosh \tau \pi} P_{ir-0.5}(\cosh \alpha) d\tau = \frac{1}{\sqrt{2 \cosh \alpha + 2 \cos \theta}} \tag{25}$$

Eq.(24) becomes

$$E_C^*(\tau) \cosh[(\theta - \pi)\tau] - bE_S^*(\tau) f(k_R, \tau) = \sqrt{2}(a + bT_W - C_\infty) \frac{\cosh(\tau \theta)}{\cosh(\tau \pi)} \tag{26}$$

Together with Eqs. (22), (26), the following can be obtained

$$\begin{aligned}
E_S^*(\tau) & = \frac{\sqrt{2}(a + bT_W - C_\infty) E_0 \cosh(\tau \theta)}{b \cosh(\pi \tau)} \times \\
& \quad \frac{\frac{\partial F(\theta, \tau)}{3 \partial \theta} - \tau F(\theta, \tau) \tanh[(\theta - \pi)\tau]}{\frac{f(k_R, \tau)}{3} \frac{\partial F(\theta, \tau)}{\partial \theta} - F(\theta, \tau) \tau g(k_R, \tau) - E_0 \left\{ \frac{\partial F(\theta, \tau)}{3 \partial \theta} - \tau F(\theta, \tau) \tanh[(\theta - \pi)\tau] \right\} f(k_R, \tau)}
\end{aligned} \tag{27}$$

$$E_c^*(\tau) = \frac{\sqrt{2}(a + bT_w - C_\infty) \cosh(\tau\theta)}{\cosh(\pi\tau)} \times \frac{\text{sech}[(\theta - \pi)\tau] \left( \frac{f(k_R, \tau)}{3} \frac{\partial F(\theta, \tau)}{\partial \theta} - \tau F(\theta, \tau) g(k_R, \tau) \right)}{\left\{ \frac{f(k_R, \tau)}{3} \frac{\partial F(\theta, \tau)}{\partial \theta} - \tau F(\theta, \tau) g(k_R, \tau) \right\} - E_0 \left\{ \frac{\partial F(\theta, \tau)}{3\partial \theta} - \tau F(\theta, \tau) \tanh[(\theta - \pi)\tau] \right\} f(k_R, \tau)} \quad (28)$$

where  $E_0 = bLD / k_L$  is evaporative cooling number.

hence the non-dimension concentration around droplet is

$$\tilde{C}(\alpha, \beta) = \frac{C(\alpha, \beta) - C_\infty}{C_e - C_\infty} = \sqrt{2 \cosh \alpha - 2 \cos \beta} \int_0^\infty E_c(\tau) P_{ir-0.5}(\cosh \alpha) \cosh[(2\pi - \beta)\tau] d\tau \quad (29)$$

non-dimensional temperature within droplet is

$$\tilde{T}_L(\alpha, \beta) = \frac{T_L(\alpha, \beta) - T_w}{T_w - T_\infty} = \sqrt{2 \cosh \alpha - 2 \cos \beta} \int_0^\infty P_{ir-0.5}(\cosh \alpha) E_s(\tau) \{ -H(\theta_{\text{Sub}}, \tau) \sinh[(\pi - \theta_{\text{Sub}} - \beta)\tau] + \sinh(\theta_{\text{Sub}} \tau) \cosh[(\pi - \theta_{\text{Sub}} - \beta)\tau] \} d\tau \quad (30)$$

Non-dimensional temperature within the substrate is

$$\tilde{T}_s(\alpha, \beta) = \frac{T_s(\alpha, \beta) - T_w}{T_w - T_\infty} = \sqrt{2 \cosh \alpha - 2 \cos \beta} \int_0^\infty E_s(\tau) P_{ir-0.5}(\cosh \alpha) \sinh[(\pi - \beta)\tau] d\tau \quad (31)$$

Where

$$E_s(\tau) = \frac{E_0 \cosh(\tau\theta)}{\cosh(\pi\tau)} \times \frac{\frac{\partial F(\theta, \tau)}{3\partial \theta} - \tau F(\theta, \tau) \tanh[(\theta - \pi)\tau]}{\left\{ \frac{f(k_R, \tau)}{3} \frac{\partial F(\theta, \tau)}{\partial \theta} - F(\theta, \tau) \tau g(k_R, \tau) \right\} - E_0 \left\{ \frac{\partial F(\theta, \tau)}{3\partial \theta} - \tau F(\theta, \tau) \tanh[(\theta - \pi)\tau] \right\} f(k_R, \tau)} \quad (32)$$

$$E_c(\tau) = \frac{\cosh(\tau\theta)}{\cosh(\pi\tau)} \times \frac{\text{sech}[(\theta - \pi)\tau] \left( \frac{f(k_R, \tau)}{3} \frac{\partial F(\theta, \tau)}{\partial \theta} - \tau F(\theta, \tau) g(k_R, \tau) \right)}{\left\{ \frac{f(k_R, \tau)}{3} \frac{\partial F(\theta, \tau)}{\partial \theta} - \tau F(\theta, \tau) g(k_R, \tau) \right\} - E_0 \left\{ \frac{\partial F(\theta, \tau)}{3\partial \theta} - \tau F(\theta, \tau) \tanh[(\theta - \pi)\tau] \right\} f(k_R, \tau)} \quad (33)$$

#### 4. The lifetime of droplet

After integrating the evaporative flux over the gas-liquid interface in toroidal coordinates, the evaporation rate can be obtained:



$$\begin{aligned}
\frac{dm(\theta)}{dt} &= \rho_L \frac{dV(\theta)}{dt} = - \int_0^\infty 2\pi R^2 J(\alpha, \theta) \frac{\sinh \alpha}{(\cosh \alpha + \cos \theta)^2} d\alpha \\
&= -D(C_e - C_\infty) 2\sqrt{2}\pi R \times \\
&\int_0^\infty d\tau \int_0^\infty (\cosh \alpha + \cos \theta)^{-0.5} \sinh \alpha \{E_C(\tau) P_{ir-0.5}(\cosh \alpha) \left[ \frac{\cosh[(\theta - \pi)\tau] \sin \theta}{2(\cosh \alpha + \cos \theta)} - \tau \sinh[(\theta - \pi)\tau] \right] \} d\alpha
\end{aligned} \tag{34}$$

In the above equation, the double integral term is a function of  $\theta$ ,  $E_0$  and  $k_R$ , it can be defined as

$$\begin{aligned}
\varphi(\theta, k_R, E_0) &= \\
&\int_0^\infty d\tau \int_0^\infty (\cosh \alpha + \cos \theta)^{-0.5} \sinh \alpha \{E_C(\tau) P_{ir-0.5}(\cosh \alpha) \left[ \frac{\cosh[(\theta - \pi)\tau] \sin \theta}{2(\cosh \alpha + \cos \theta)} - \tau \sinh[(\theta - \pi)\tau] \right] \} d\alpha
\end{aligned} \tag{35}$$

Thus

$$\frac{dm(\theta)}{dt} = \rho_L \frac{dV(\theta)}{dt} = -D(C_e - C_\infty) 2\sqrt{2}\pi R \varphi(\theta, k_R, E_0) \tag{36}$$

The volume of droplet can be obtained:

$$V = \frac{\pi R^3}{3g(\theta)} - \frac{\pi R^3}{3g(\theta_{\text{Sub}})} \tag{37}$$

$$\text{where } g(\theta) = \frac{\sin^3 \theta}{(1 - \cos \theta)^2 (2 + \cos \theta)},$$

During the evaporation the droplet is assumed to be pinned on the substrate, i.e. it is in the Constant Contact Radius (CCR) mode, the base radius is kept constant and the contact angle of droplet decreases with time, so together with Eqs. (34), (37), it can be obtained as

$$\frac{d\theta}{dt} = - \frac{D(C_e - C_\infty)}{\rho_L R^2} 2\sqrt{2}\pi \varphi(\theta, k_R, E_0) (1 + \cos \theta)^2 \tag{38}$$

The lifetime of evaporation of droplet can be obtained

$$t_{\text{CCR}} = \frac{\rho_L R_0^2}{2\sqrt{2}D(C_e - C_\infty)} \int_{\theta_{\text{sub}}}^{\theta_0} \frac{1}{\varphi(\theta, k_R, E_0) (1 + \cos \theta)^2} d\theta \tag{39}$$

where the  $\theta_0$  and  $R_0$  are the initial tangential angle of the droplet surface with the plane at the edge and initial base radius respectively.
